# Supplementary material
Source: MDPI journal article supplement (https://www.mdpi.com/2227-9717/5/2/18)
Supplement: s2 [file s2]

Supplementary Materials: Biodegradable and Biocompatible PDLLA-PEG1k-PDLLA Diacrylate Macromers: Synthesis, Characterisation and Preparation of Soluble Hyperbranched Polymers and Crosslinked Hydrogels

Alan Hughes, Hongyun Tai, Anna Tochwin and Wenxin Wang

**Figure S1.** General molecular structure of diacryl-PDLLA-PEG1k-PDLLA.

o

**Figure S2.** 1H NMR of PDLLA-PEG1k-PDLLA Co-polymer 1KL10.

**Figure S3.** 1H NMR and chemical structure of diacryl-PDLLA-PEG1k-PDLLA Macromer 1KL10 (Mac-1KL10).


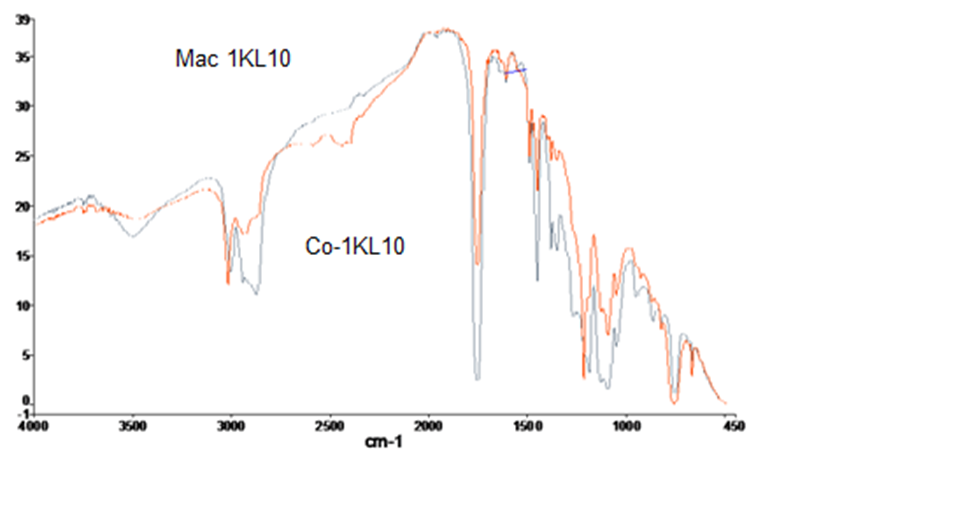


Figure S4. FT-IR Spectra for Co-1KL10 (red) and Mac-1KL10 (blue).
